# Supplementary material for: Specialized interfaces of Smc5/6 control hinge stability and DNA association
Source: PubMed Central journal article supplement (PMC5290277; doi:10.1038/ncomms14011), 2017-01-30
Supplement: ncomms14011-s1.pdf [file ncomms14011-s1.pdf]

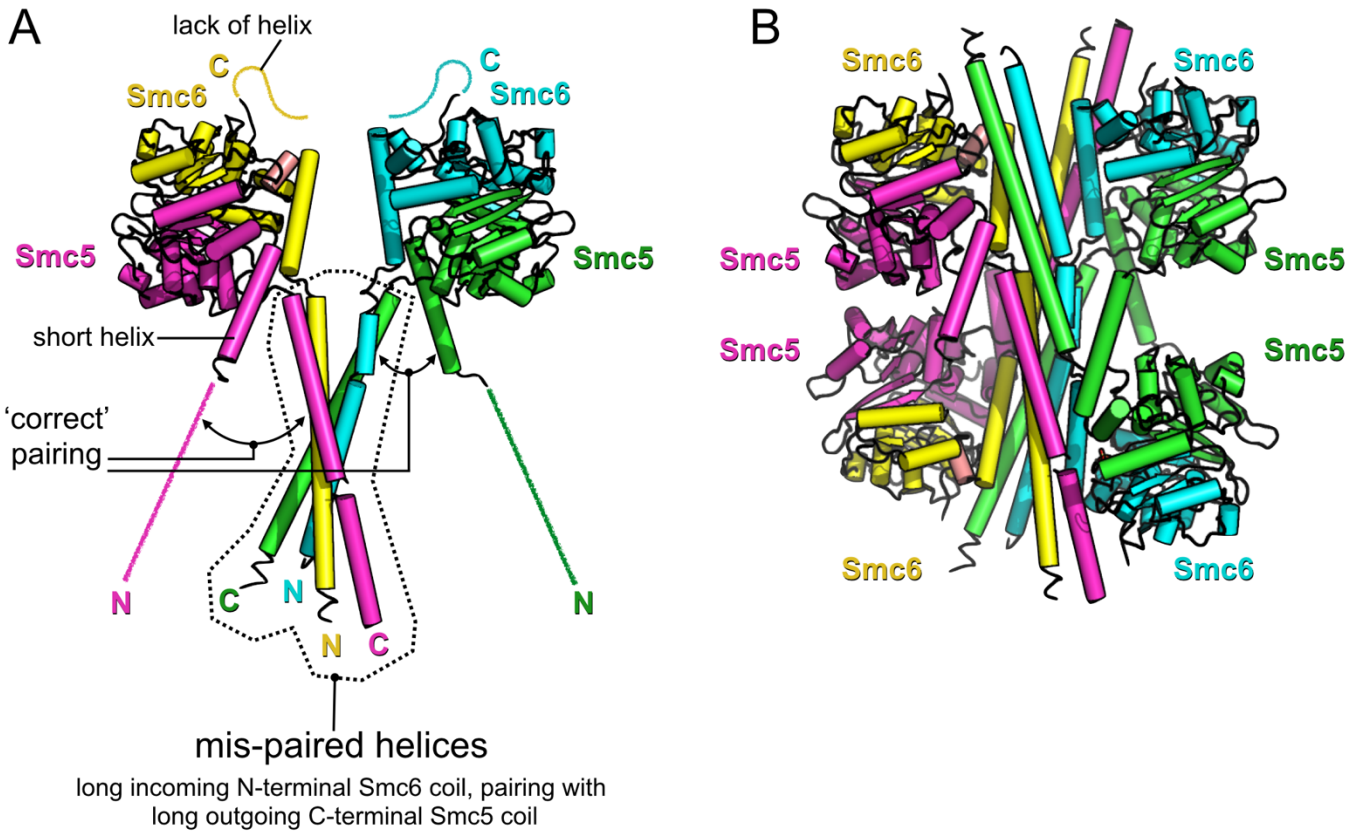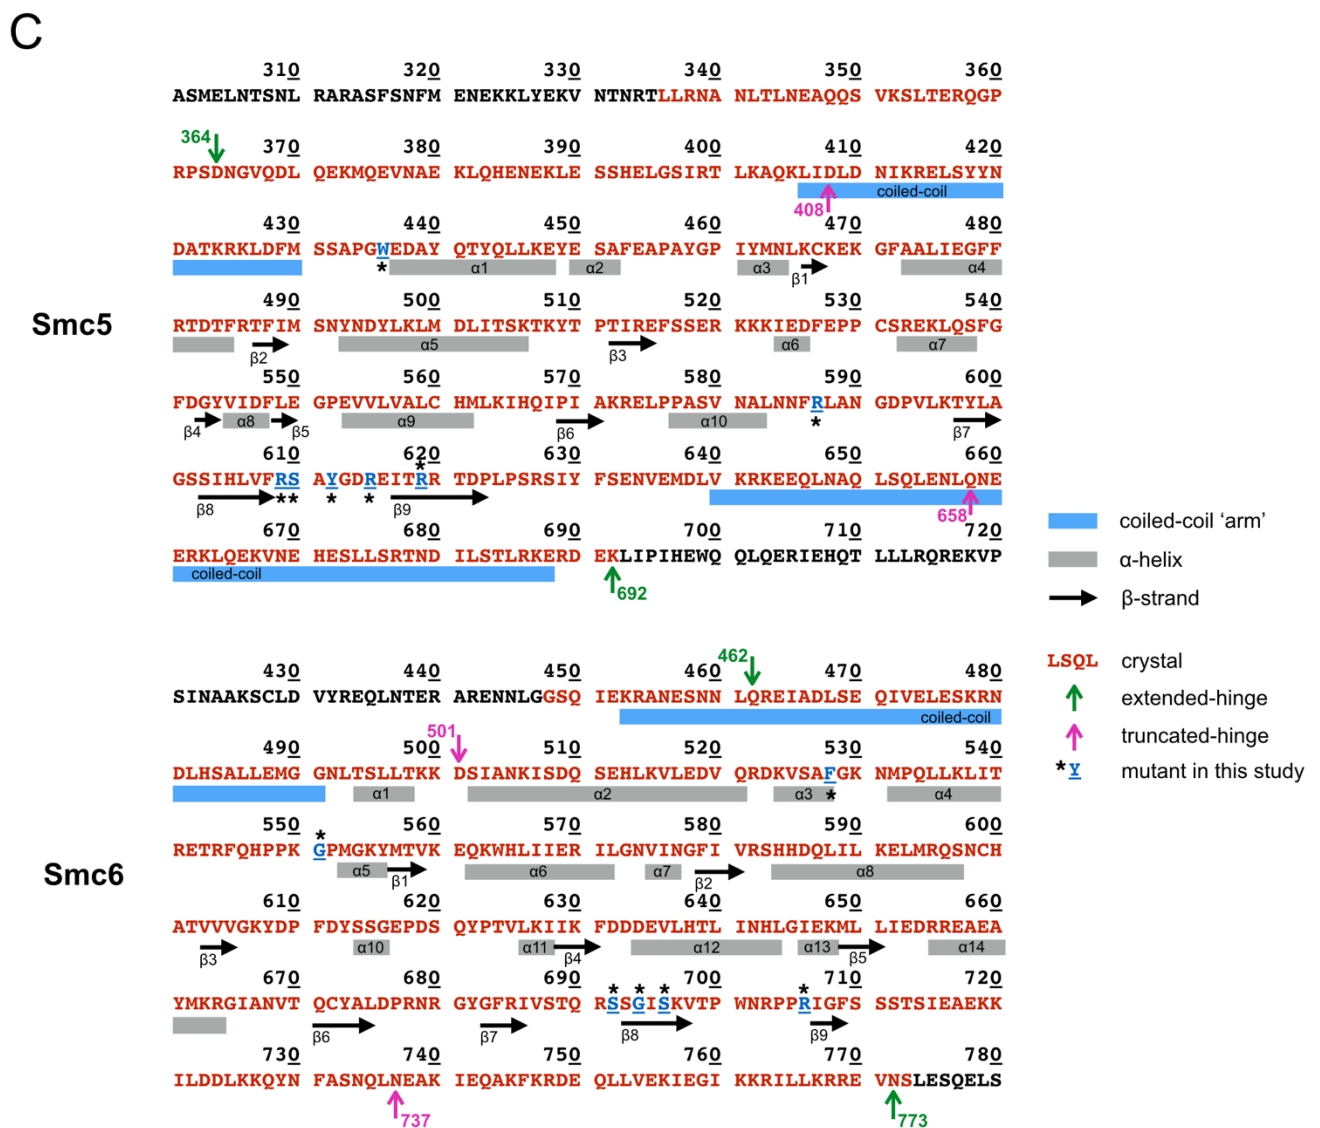

## **Supplementary Figure 1**

### **The asymmetric unit of Smc5/6-hinge crystals**

(A) The asymmetric unit of Smc5/6-hinge crystals contains two hetero-dimers, shown in molecular cartoon representation. Smc5 is coloured magenta and green, and Smc6 yellow and cyan. The constructs expressing Smc5 (aa 336-692) and Smc6 (448-703) encode mismatched lengths of coiled-coil, at both the N- and C-termini. This has resulting in mis-pairing of the incoming N-terminal coil of Smc6, with the outgoing C-terminal coil of Smc5 in the asymmetric unit. (B) Partially expanded crystal lattice, highlighting the complex arrangement of the component hetero-dimers. (C) Annotated amino acid sequence for the hinge-regions of *S.pombe* Smc5 and Smc6. See associated key for full details.

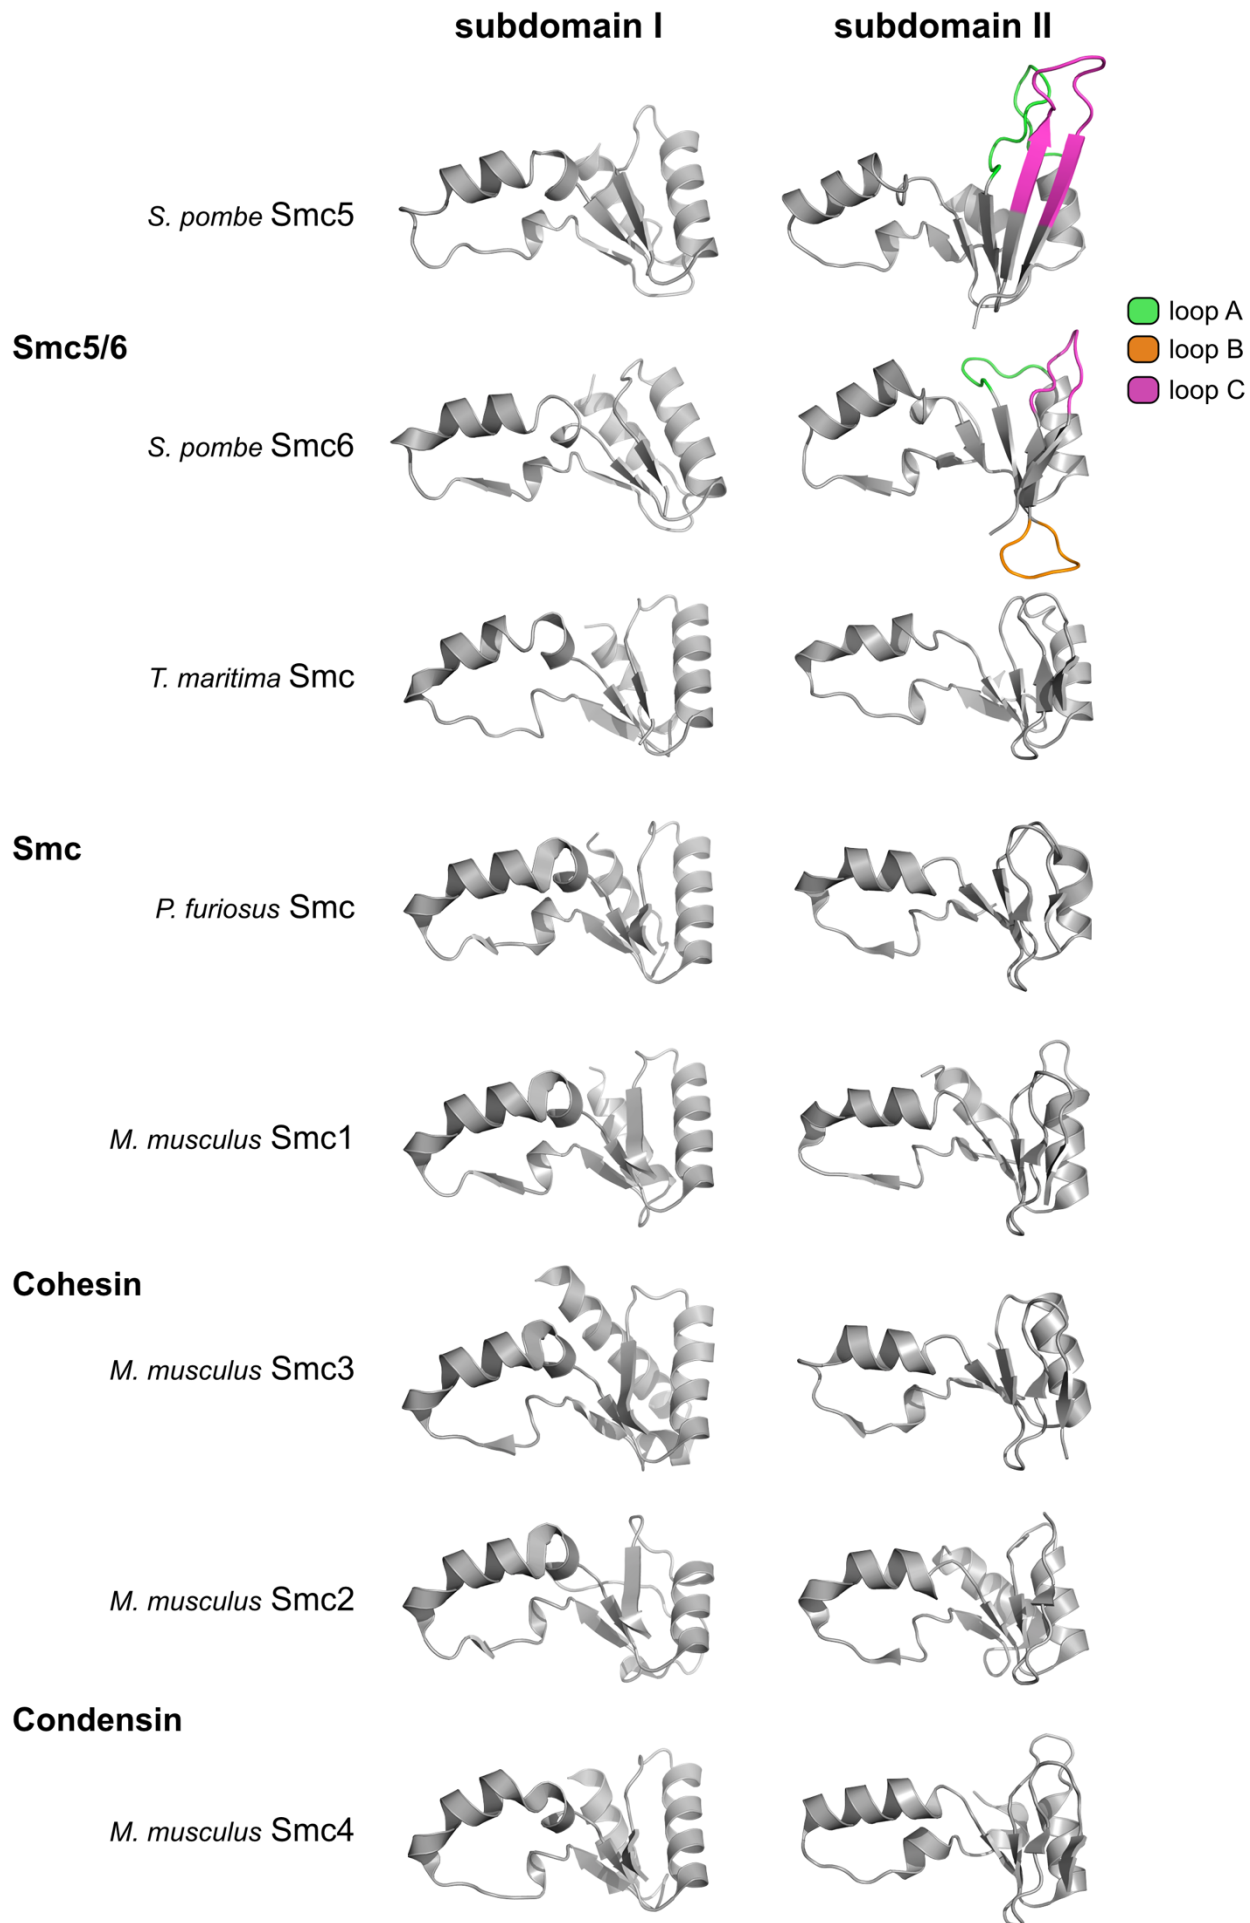

## **Supplementary Figure 2**

### **Subdomains of selected SMC-family proteins**

Molecular cartoon representations are shown for subdomain I (left) and subdomain II (right) for the indicated SMC proteins. The points of amino acid insertion in subdomain II of Smc5 and Smc6 are additionally highlighted. Loop A, B and C are coloured green, orange and magenta respectively.



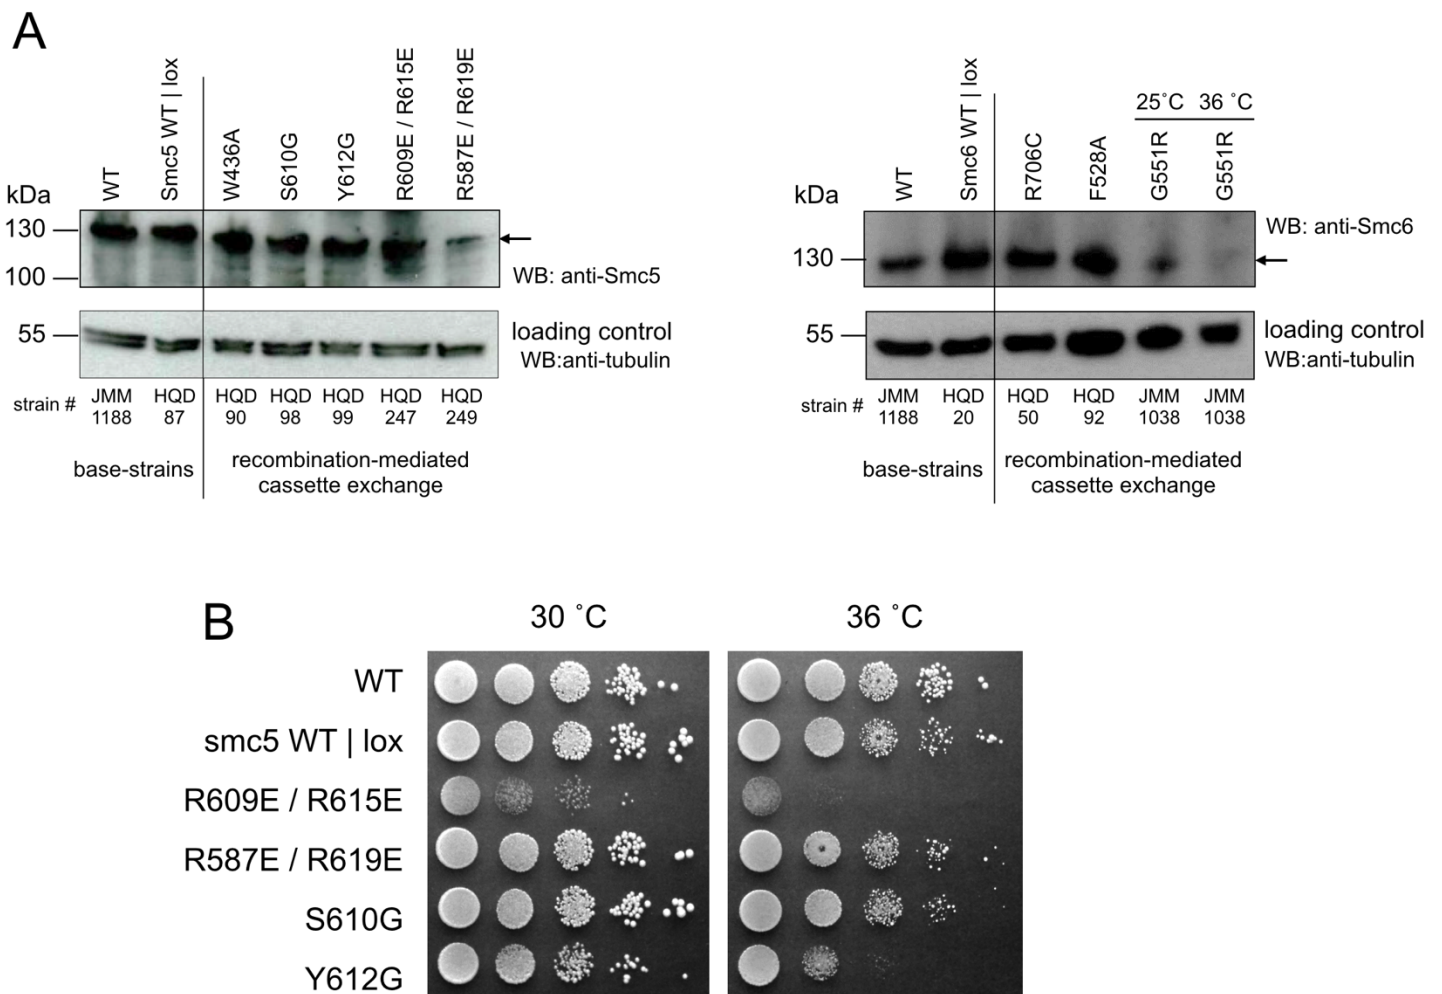

### Supplementary Figure 3

#### Analysis of yeast strains

(A, left) Western blot confirming expression of Smc5 in the indicated *S.pombe* strains. (A, right) Western blot confirming expression of Smc6 in the indicated *S.pombe* strains. The JMM1038 strain, containing the temperature sensitive Smc6 mutation G551R (*smc6-T2*) was incubated at 25 °C or 36 °C for a period of 4 hours prior to harvesting and lysis. The loss of signal at 36 °C confirms specificity of the Smc6 antibody. (B) Temperature sensitivity of Smc5-Loop C and Arginine-pair mutants.

## 6-Mut: Smc6-S692E, -G694K, -S696E

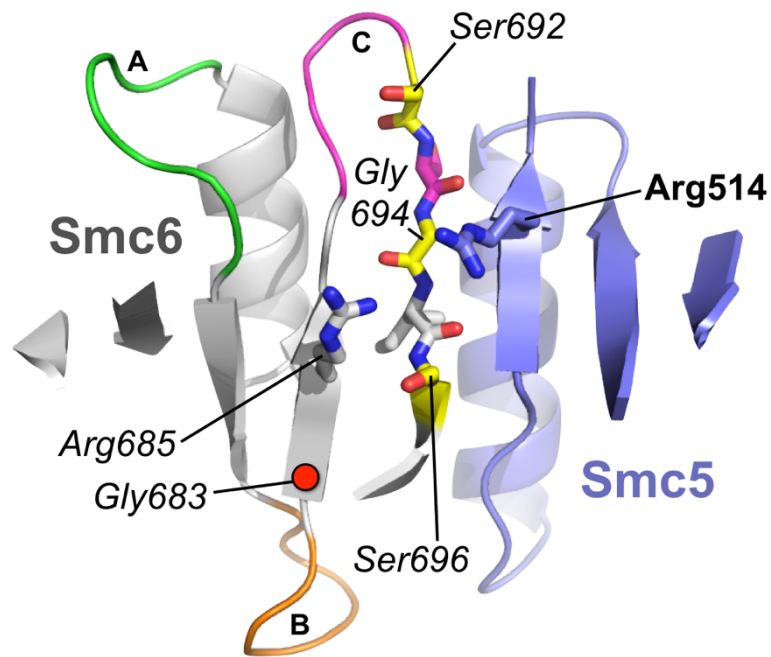

## South

### Supplementary Figure 4

#### Molecular details for the 6-Mut series of mutations

Molecular cartoon representation of the 'South' interface, highlighting the position of the amino acids mutated in Smc6, in order to generate '6-Mut' (coloured in yellow).

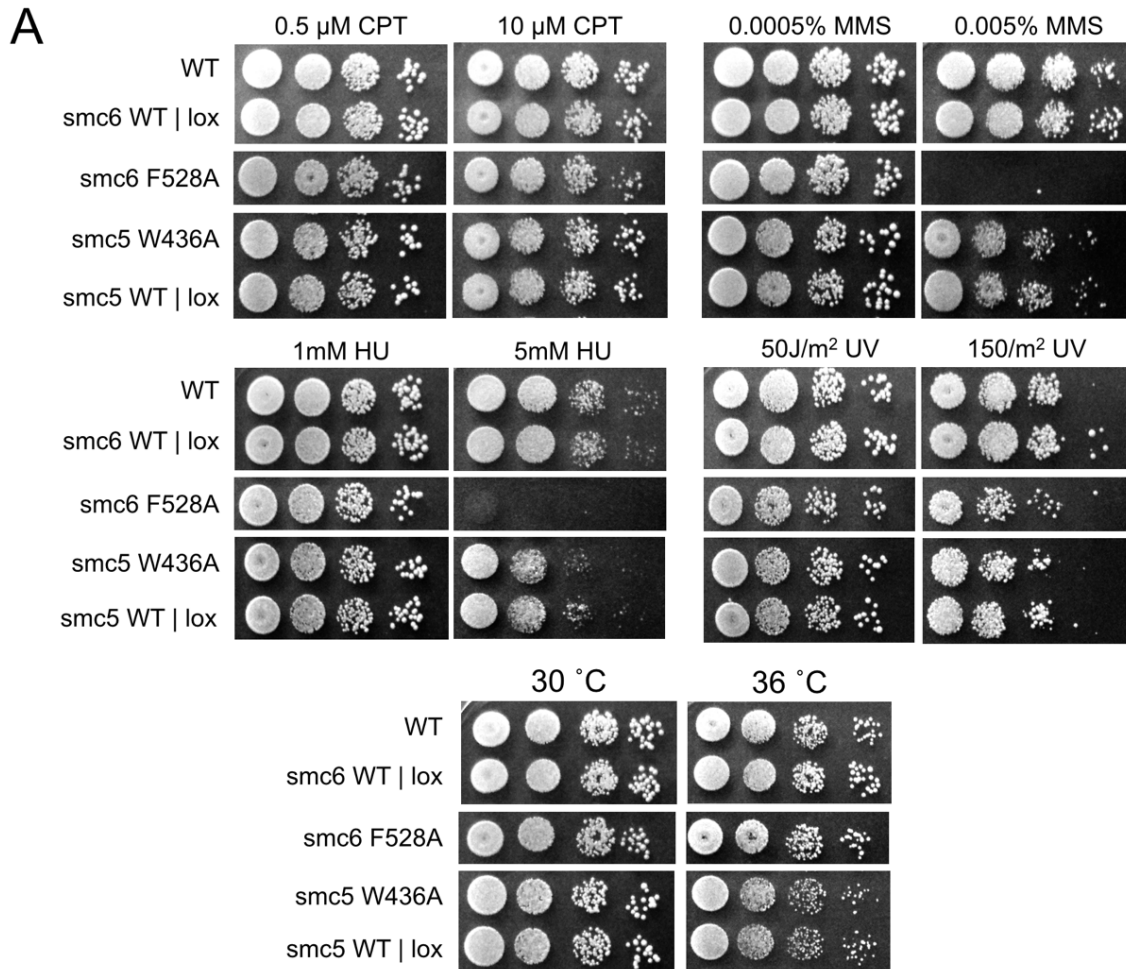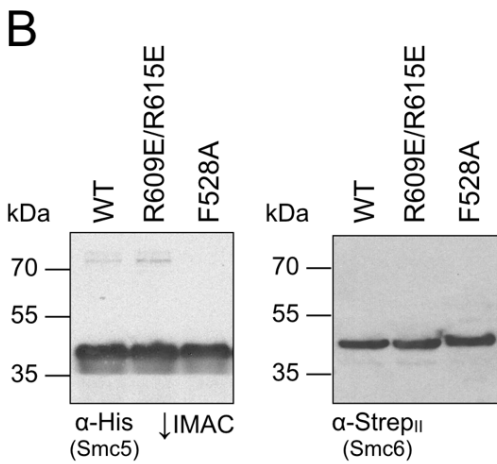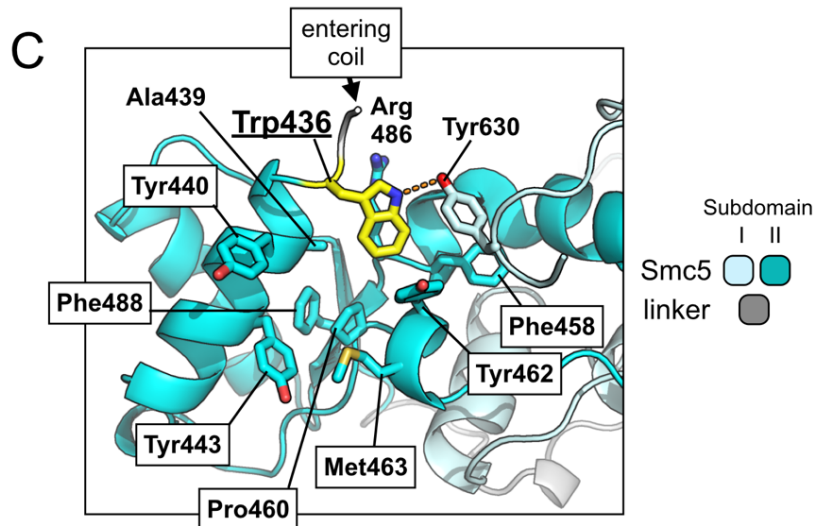

### **Supplementary Figure 5**

#### **DNA damage and temperature sensitivity of the Smc6-F528A and Smc5-W436A *S.pombe* strains**

(A) Doses and type of treatment are as indicated. (B) Co-expression / co-purification assay. His-Tagged Smc5-hinge was co-expressed with StrepII-tagged Smc6-hinge in *E.coli*. After lysis, and clarification, the soluble fraction was passed through a IMAC column, capturing Smc5-hinge. After successive washes, to remove any unbound material, the amount of co-purified Smc6-hinge was assessed by western blot. (C) Molecular details of the Smc5-W436 locus – which is predominantly hydrophobic in nature. Key amino acids residues are labelled. Trp436 is additionally highlighted in yellow.

**A**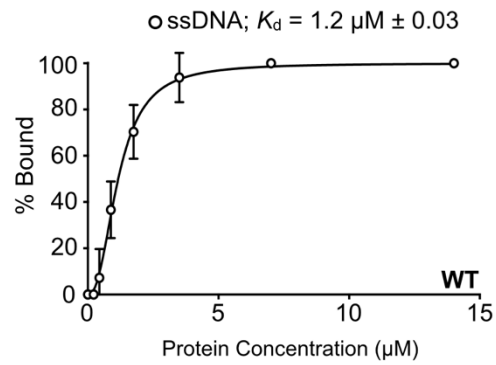**B**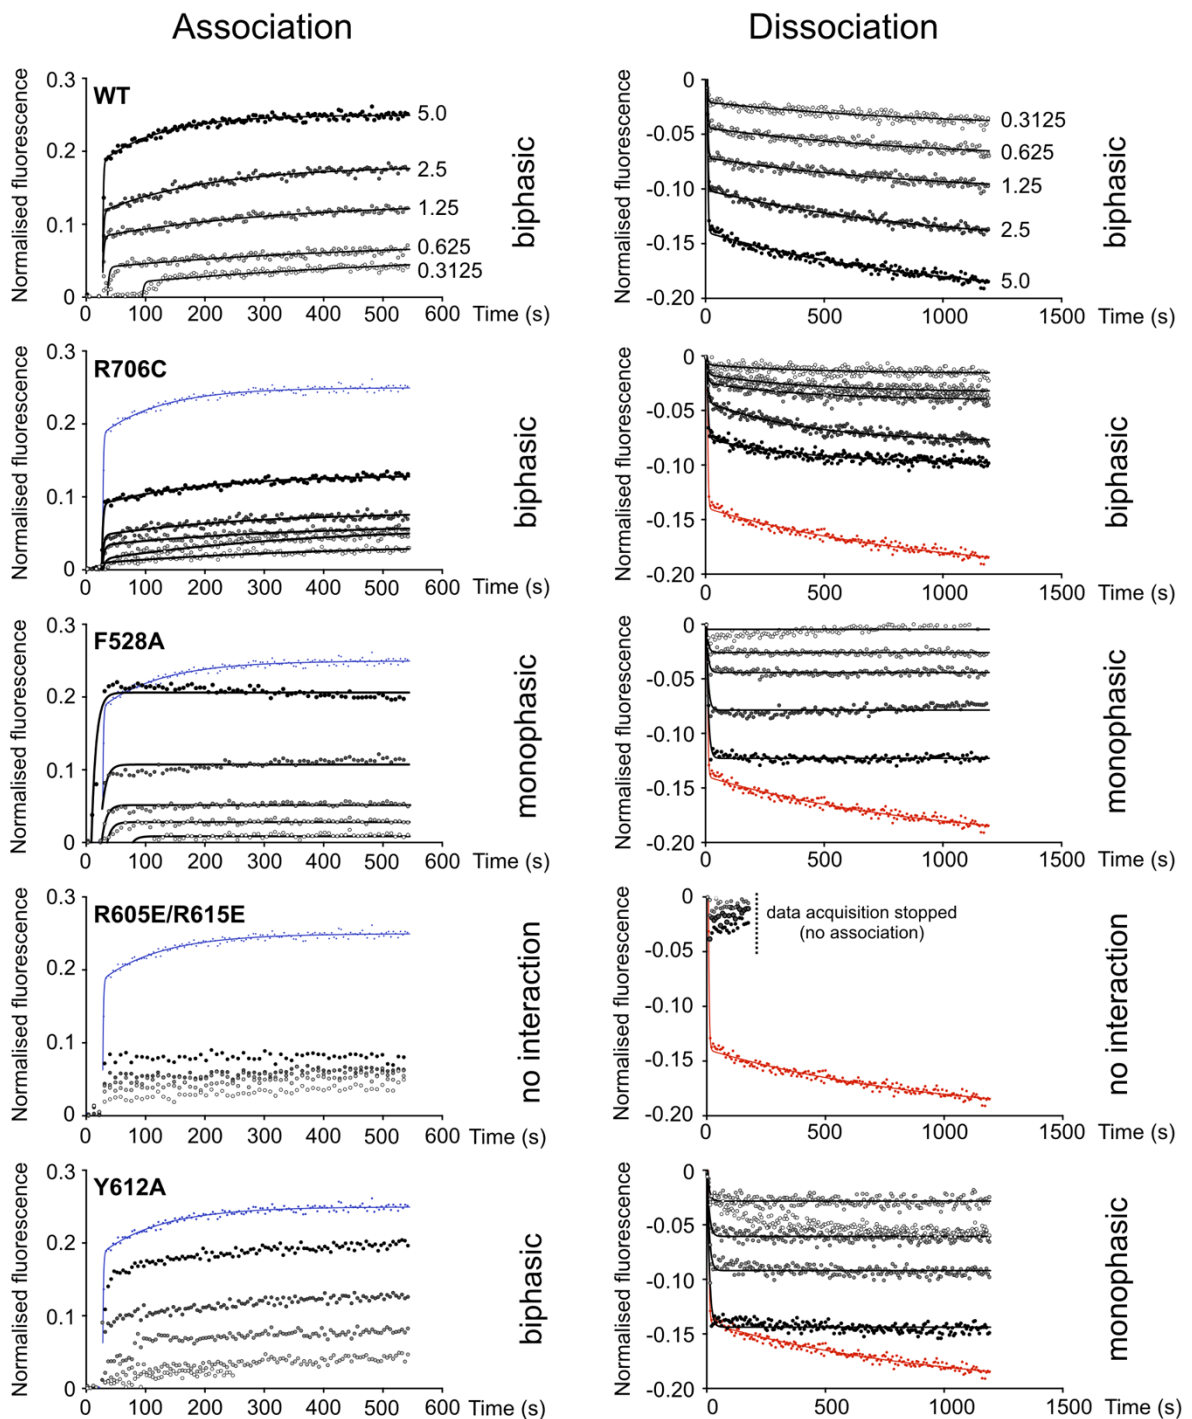

## **Supplementary Figure 6**

### **Interactions of WT and mutant Smc5/6-hinge with ssDNA**

(A) Quantification of EMSA experiment (Figure 6B in manuscript), data-points represent the mean of 3 experiments, with error bars indicating one standard deviation. Dissociation constants ( $K_d$ ) were determined by least-squares fitting of a one-site model. (B) Representative SwitchSENSE association and dissociation  $F_{\text{down}}$  sensorgrams for the indicated Smc5/6-hinge protein. For ease of comparison the association (coloured blue) or dissociation curve (red) for the wild-type protein at a concentration of 5  $\mu\text{M}$  is also shown for each mutant.

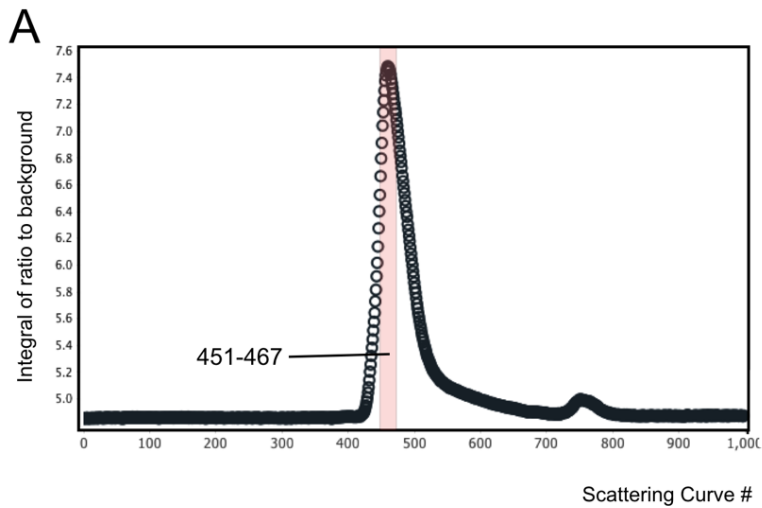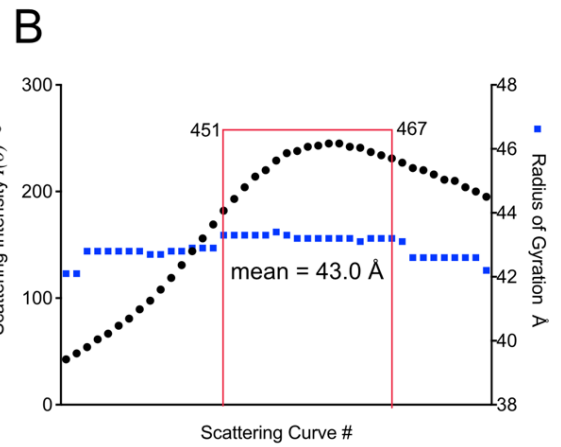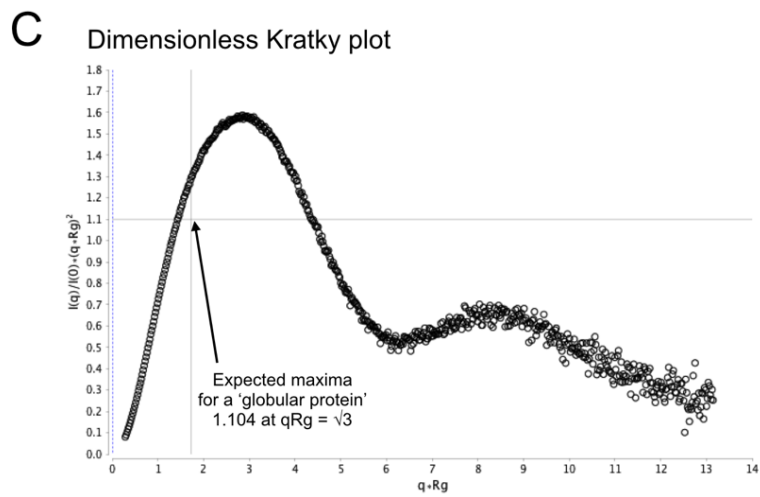

**D**

|                                       | ATSAS (2.7.2)   | ScÅtter (3.0c) |
|---------------------------------------|-----------------|----------------|
| Guinier $R_g$ , $\text{\AA}$          | $44.6 \pm 1.5$  | 43.0           |
| Guinier $I(0)$ , arbitrary units      | $234.6 \pm 0.3$ | 231            |
| Quality                               | 0.96            | -              |
| Aggregated?                           | 0.0049          | -              |
| $P(r)$ $R_g$ , $\text{\AA}$           | $45.1 \pm 0.4$  | 44.7           |
| $P(r)$ $I(0)$ , arbitrary units       | $235 \pm 0.9$   | 232            |
| Porod volume estimate, $\text{\AA}^3$ | 161185          | 178207         |
| $D_{\max}$ , $\text{\AA}$             | 156             | 165            |

## Supplementary Figure 7

### Supporting data for Small-angle X-ray Scattering (SAXS) experiments

(A,B) Scattering profiles corresponding to curves #451-467 (red rectangle) were selected for downstream analysis and averaging; they covered a wide concentration range, yet produced a consistent value for  $R_g$  of  $\sim 43$  Å (ScÅtter<sup>1</sup>)

(C) Dimensionless Kratky plot (ScÅtter) for the scattering profile, obtained by merging and averaging curves #451-467. The Smc5/6-hinge does not have a compact, globular structure in solution, it instead adopts an extended conformation with some intrinsic level of flexibility<sup>2</sup>.

(D) Summary of parameters determined for Smc5/6-hinge using SAXS with the indicated software packages ATSAS<sup>3</sup> and ScÅtter<sup>1</sup>.



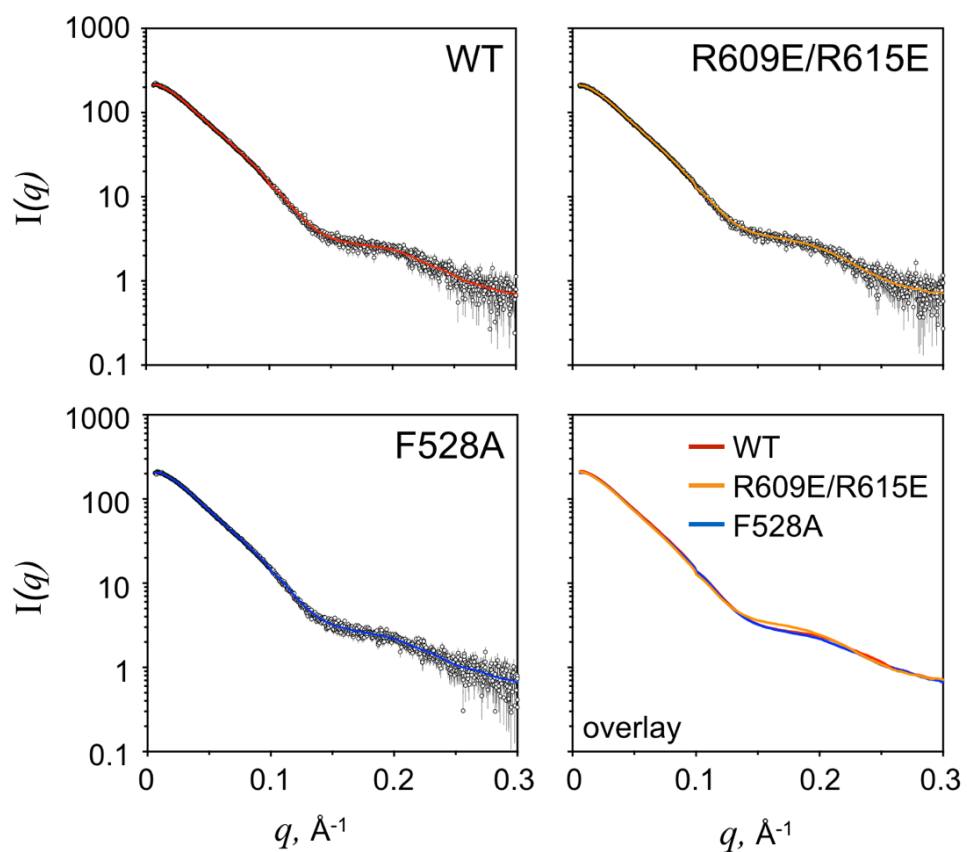

### Supplementary Figure 8

#### Scattering profiles of WT Smc5/6-hinge, R609E/R615E and F528A mutants

Experimental data (open circles) with smoothed polynomial line-of-best-fit are shown in each case.



## Supplementary Table 1

### Amino acid boundaries of expression constructs

|                   | <b>Smc5</b> |            | <b>Smc6</b> |            |
|-------------------|-------------|------------|-------------|------------|
|                   | N-terminus  | C-terminus | N-terminus  | C-terminus |
| Crystal structure | 336         | 692        | 448         | 703        |
| Extended-hinge    | 364         | 692        | 462         | 773        |
| Truncated-hinge   | 408         | 658        | 501         | 737        |

## Supplementary Table 2

### X-ray diffraction: Data collection, phasing and refinement statistics

|                                                     | Native               | SeMet                  |
|-----------------------------------------------------|----------------------|------------------------|
| <b>Data collection</b>                              |                      |                        |
| Space group                                         | C222 <sub>1</sub>    | C222 <sub>1</sub>      |
| Cell dimensions                                     |                      |                        |
| <i>a</i> , <i>b</i> , <i>c</i> (Å)                  | 172.56 196.46 122.44 | 171.36, 195.06, 121.18 |
| $\alpha$ , $\beta$ , $\gamma$ (°)                   | 90, 90, 90           | 90, 90, 90             |
| Wavelength                                          | 0.9795               | 0.9788                 |
| Resolution (Å)                                      | 45.6 (2.75)          | 48.8 (4.7)             |
| <i>Mn</i> I / $\sigma$ I                            | 11.9 (1.4)           | 11.4 (8.9)             |
| <i>Mn</i> I, CC <sub>1/2</sub>                      | 0.998 (0.530)        | 0.995 (0.983)          |
| Completeness (%)                                    | 100 (100)            | 99.9 (100)             |
| Redundancy                                          | 6.6 (6.7)            | 12.6 (12.9)            |
| <b>Refinement</b>                                   |                      |                        |
| Resolution (Å)                                      | 45.6 (2.75)          |                        |
| No. unique reflections                              | 54252                |                        |
| <i>R</i> <sub>work</sub> / <i>R</i> <sub>free</sub> | 0.21 / 0.25          |                        |
| No. atoms                                           | 8697                 |                        |
| Macromolecules                                      | 8575                 |                        |
| Ligands                                             | 63                   |                        |
| Solvent                                             | 132                  |                        |
| <i>B</i> -factors                                   |                      |                        |
| Wilson                                              | 62.3                 |                        |
| ADP (mean)                                          |                      |                        |
| Macromolecules                                      | 82.2                 |                        |
| Ligands                                             | 132.8                |                        |
| Solvent                                             | 65.9                 |                        |
| R.m.s deviations                                    |                      |                        |
| Bond lengths (Å)                                    | 0.007                |                        |
| Bond angles (°)                                     | 0.898                |                        |
| <b>Molprobit</b>                                    |                      |                        |
| All atom clashscore                                 | 13.84                |                        |
| <b>Ramachandran</b>                                 |                      |                        |
| Outliers                                            | 0.83%                |                        |
| Allowed                                             | 2.49 %               |                        |
| Favoured                                            | 96.68 %              |                        |

\*Values in parentheses are for highest-resolution shell.

### Supplementary Table 3

#### Yeast strains

| Strain name | Genotype                                                                                                       | Notes                               |
|-------------|----------------------------------------------------------------------------------------------------------------|-------------------------------------|
| JMM1188     | h- smt0 ade6-704 leu1-32 ura4-D18                                                                              | Wild type (WT)                      |
| JMM1038     | smc6-G551R ade6-704 leu1-32 ura4-D18                                                                           | Sergeant <i>et al.</i> <sup>1</sup> |
| HQD20       | smc6::loxP-smc6-ura4-loxM ade6-704 leu1-32 ura4-D18                                                            | This study                          |
| HQD50       | smc6::loxP-smc6-R706C-loxM ade6-704 leu1-32, ura4-D18                                                          | This study                          |
| HQD87       | smc5::loxP-5'-UTR-smc5-ura4-loxM ade6-704 leu1-32 ura4-D18                                                     | This study                          |
| HQD90       | smc5::loxP-5'-UTR-smc5-W436A-loxM ade6-704 leu1-32 ura4-D18                                                    | This study                          |
| HQD92       | smc6::loxP-Smc6-F528A-loxM ade6-704 leu1-32 ura4-D18                                                           | This study                          |
| HQD98       | smc5::loxP-5'-UTR-smc5-S610G-loxM ade6-704 leu1-32 ura4-D18                                                    | This study                          |
| HQD99       | smc5::loxP-5'-UTR-smc5-Y612G-loxM ade6-704, leu1-32 ura4-D18                                                   | This study                          |
| HQD247      | smc5::loxP-smc5-R609E R615E-loxM, ade6-704 leu1-32 ura4-D18                                                    | This study                          |
| HQD249      | smc5::loxP-smc5-R587E R619E-loxM ade6-704 leu1-32 ura4-D18                                                     | This study                          |
| YMS83       | smc5+/smc5::loxP-5'-UTR-smc5-ura4-loxM ade6-M210/ade6-M216 leu1-32/leu1-32 ura4-D18ura4-d18 h+/h- smt0         | This study                          |
| YMS99       | smc5+/smc5::loxP-5'-UTR- smc5-S610G Y612G-loxM ade6-M210/ade6-M216 leu1-32/leu1-32 ura4-D18ura4-d18 h+/h- smt0 | This study                          |

### Supplementary References

1. Forster, S., Apostol, L. & Bras, W. Scatter: software for the analysis of nano- and mesoscale small-angle scattering. *Journal of Applied Crystallography* **43**, 639-646 (2010).
2. Durand, D. et al. NADPH oxidase activator p67(phox) behaves in solution as a multidomain protein with semi-flexible linkers. *J Struct Biol* **169**, 45-53 (2010).
3. Petoukhov, M.V. et al. New developments in the ATSAS program package for small-angle scattering data analysis. *Journal of Applied Crystallography* **45**, 342-350 (2012).
